# Supplementary material
Source: PubMed Central journal article supplement (PMC6462490)

# Czeisler, Silva et al., Supplementary Figure 1

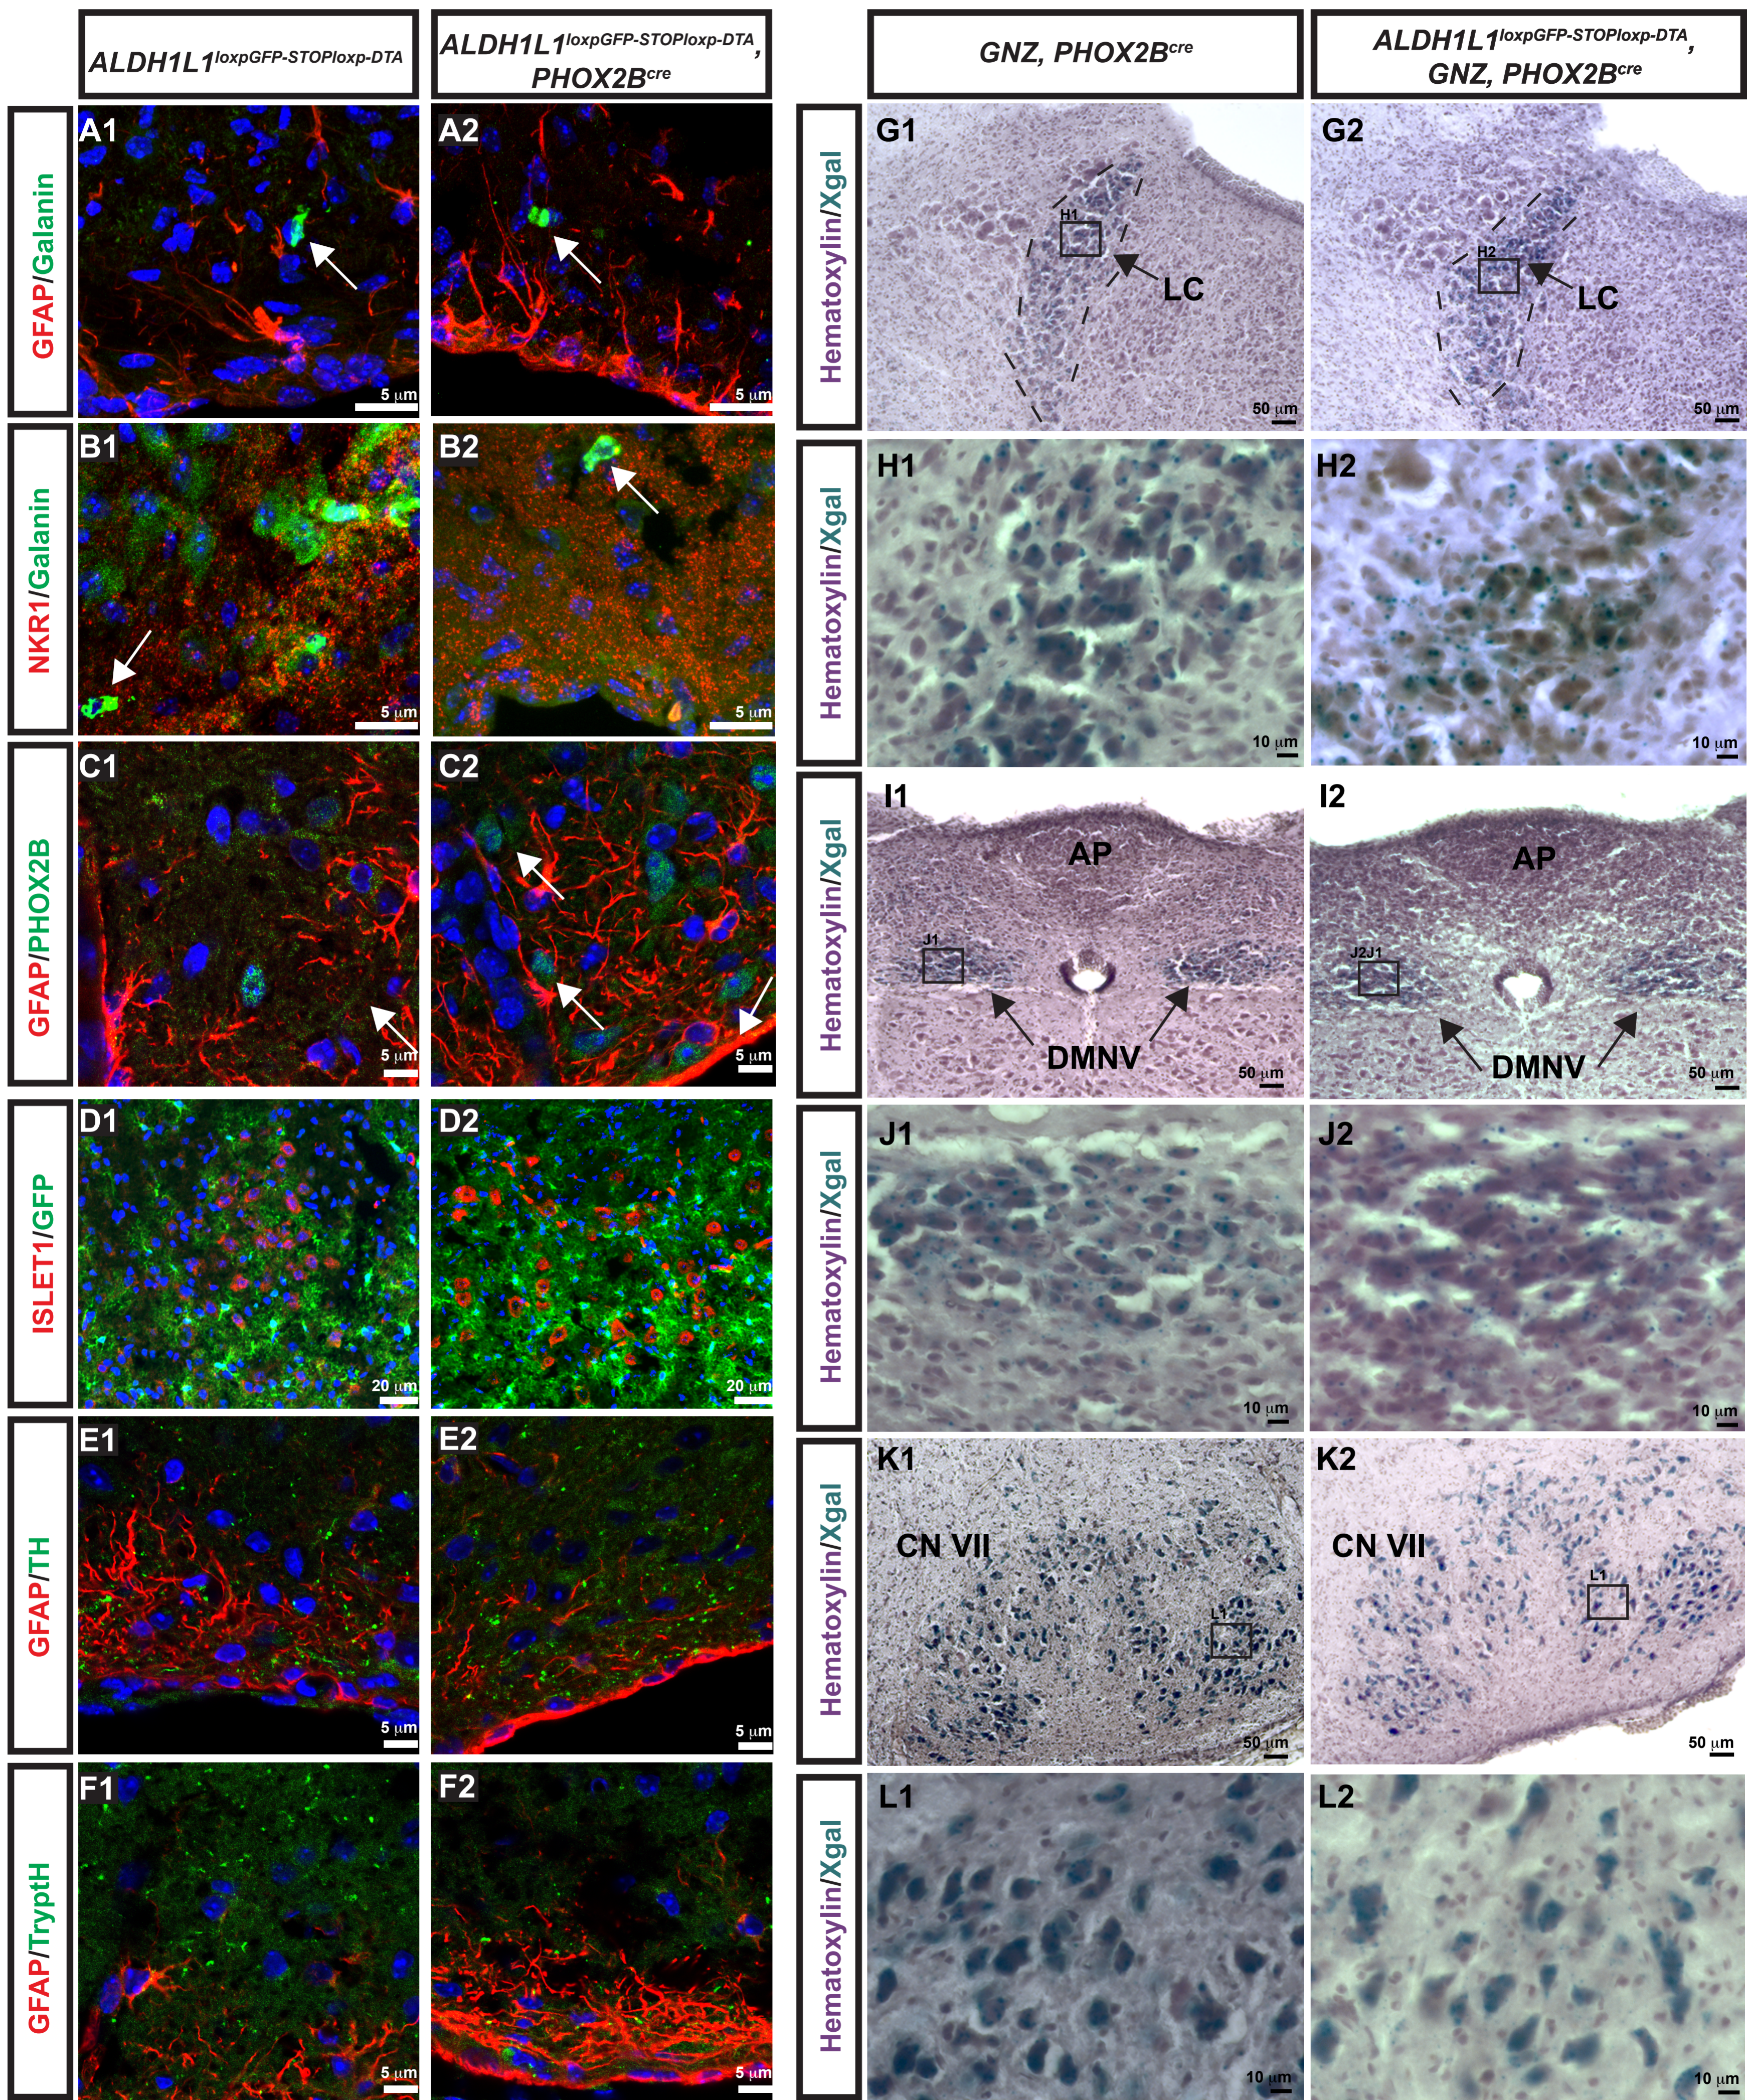

Supplement: TJP-597-2225-s002.pdf [file TJP-597-2225-s002.pdf]

Czeisler, Silva, et al., Supplementary Figure 2

**A**

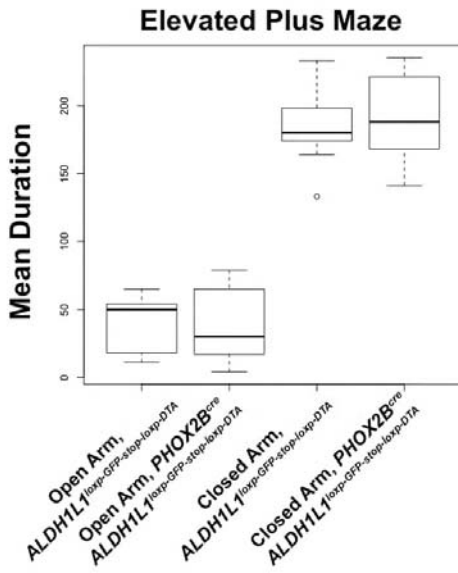

**B**

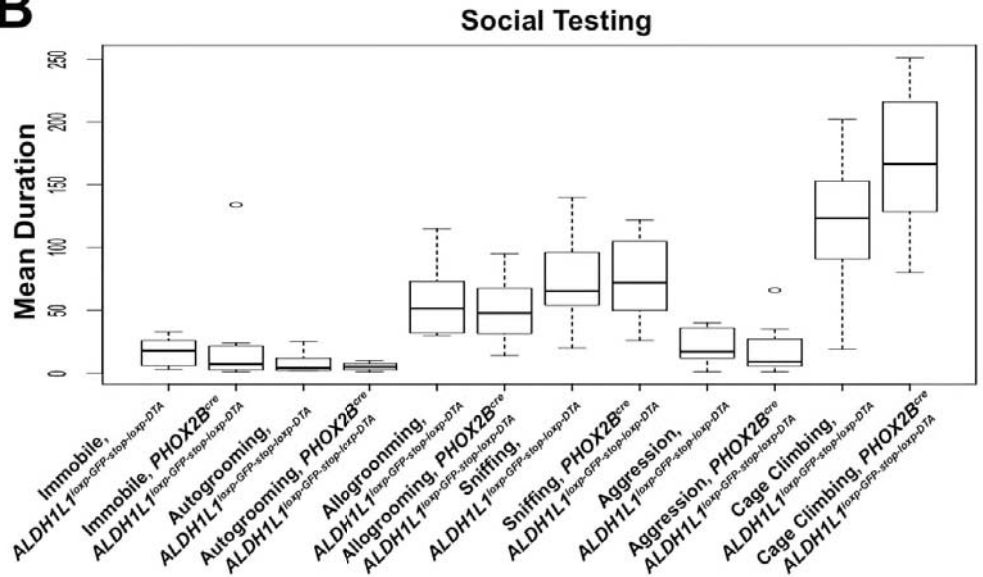

Supplement: TJP-597-2225-s003.pdf [file TJP-597-2225-s003.pdf]

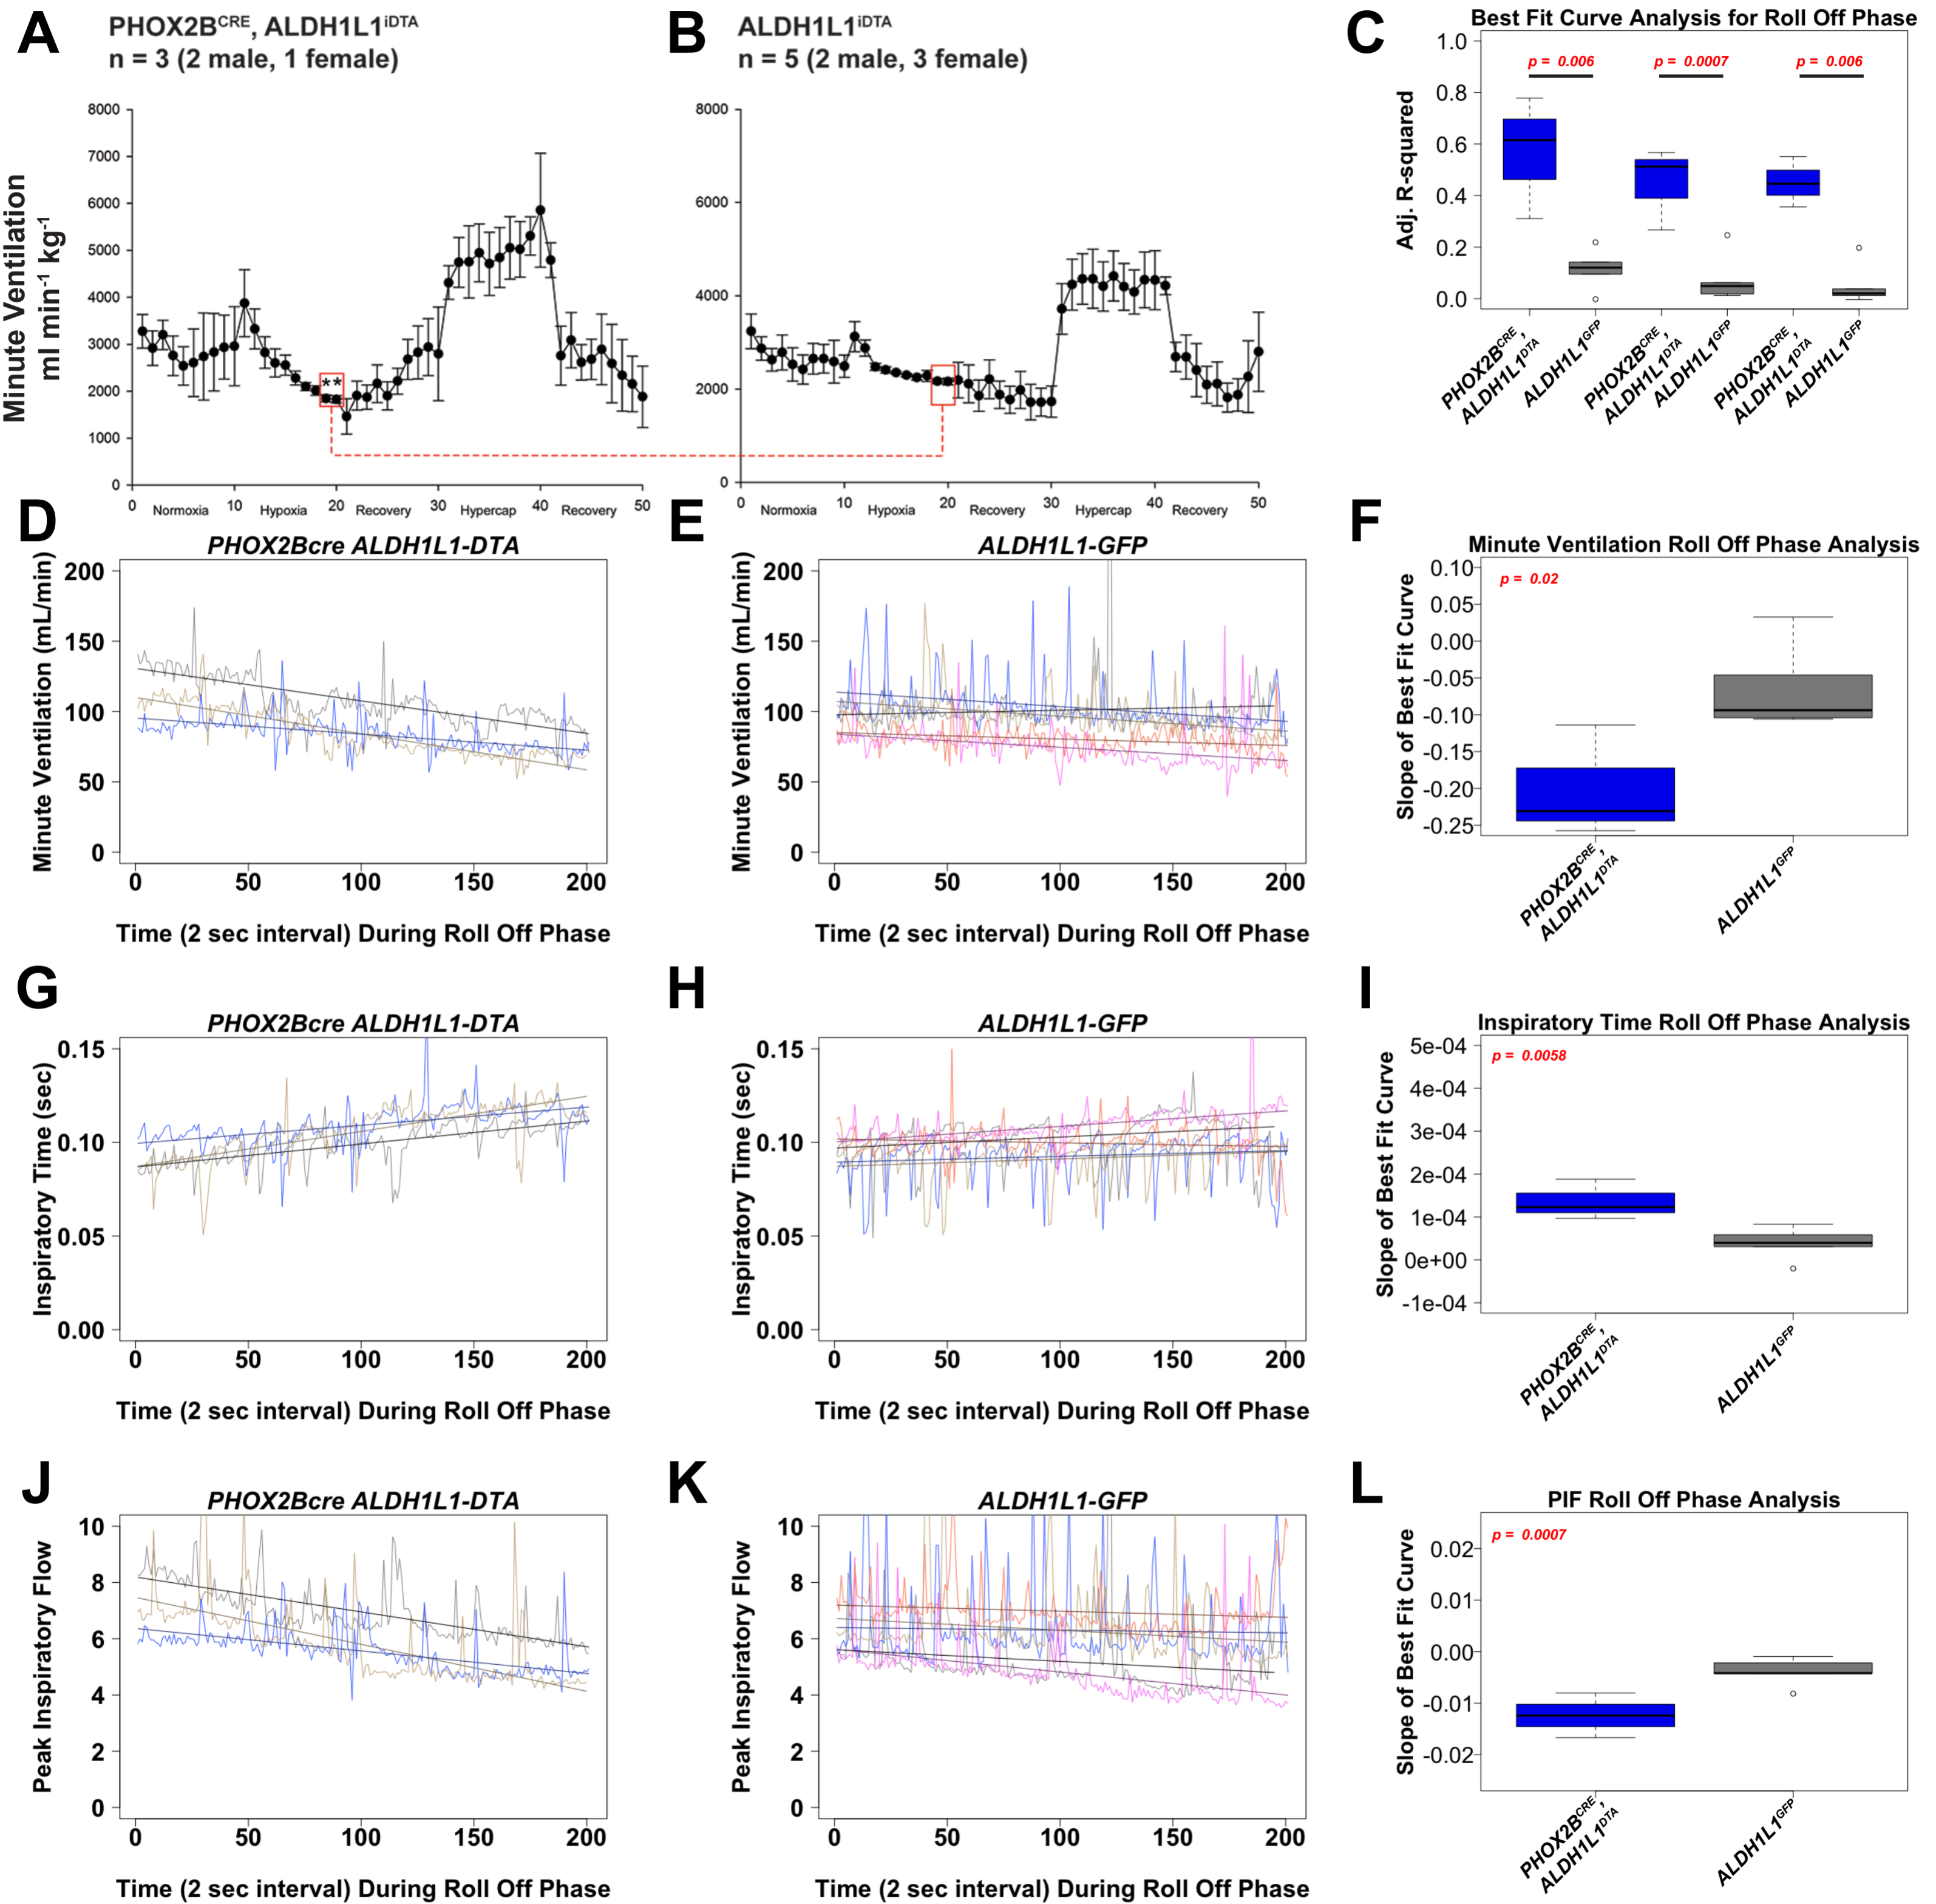

Supplement: TJP-597-2225-s004.pdf [file TJP-597-2225-s004.pdf]

# Czeisler, Silva, et al., Supplemental Figure 4

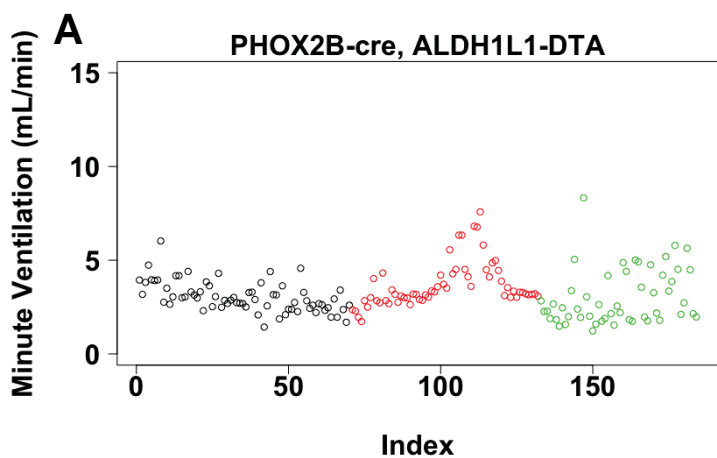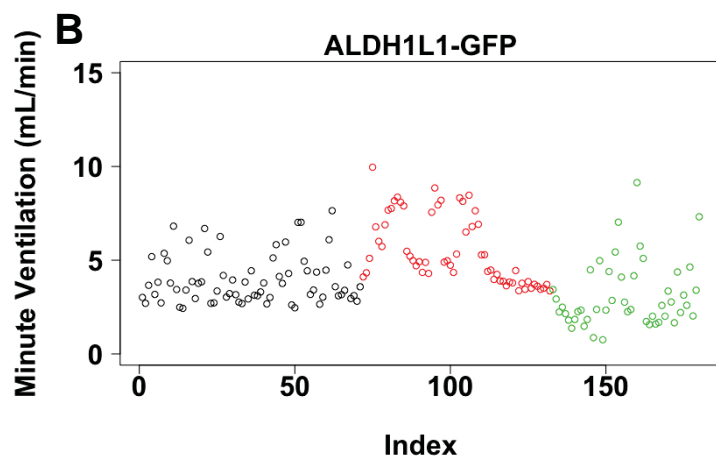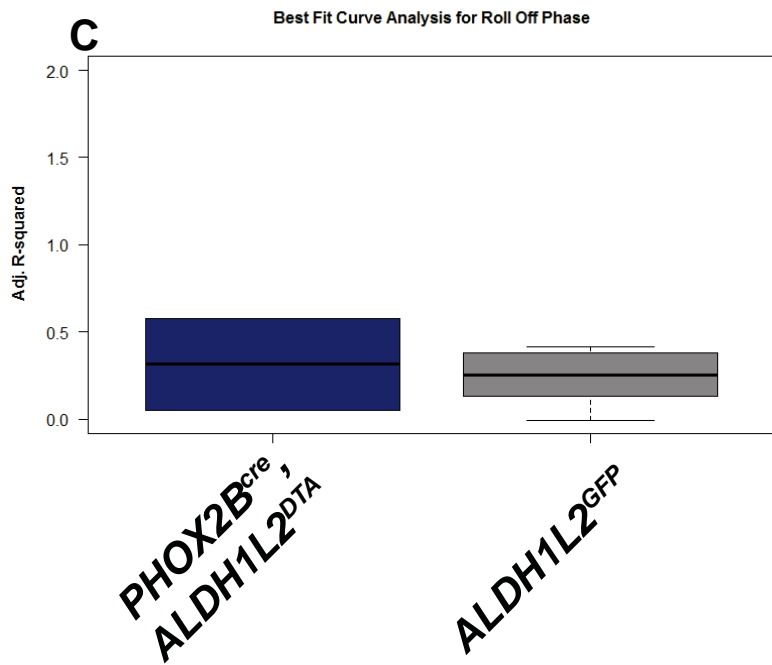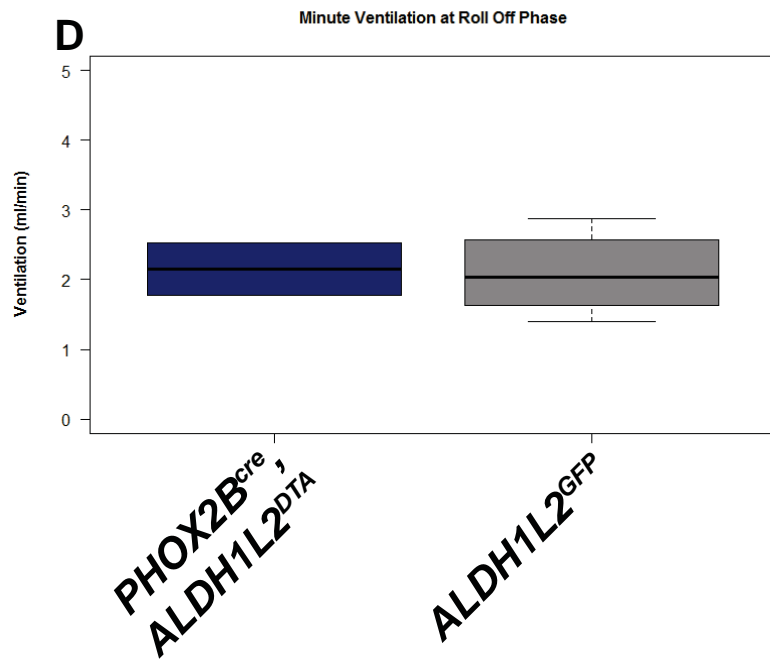

Supplement: TJP-597-2225-s005.pdf [file TJP-597-2225-s005.pdf]

**Males**

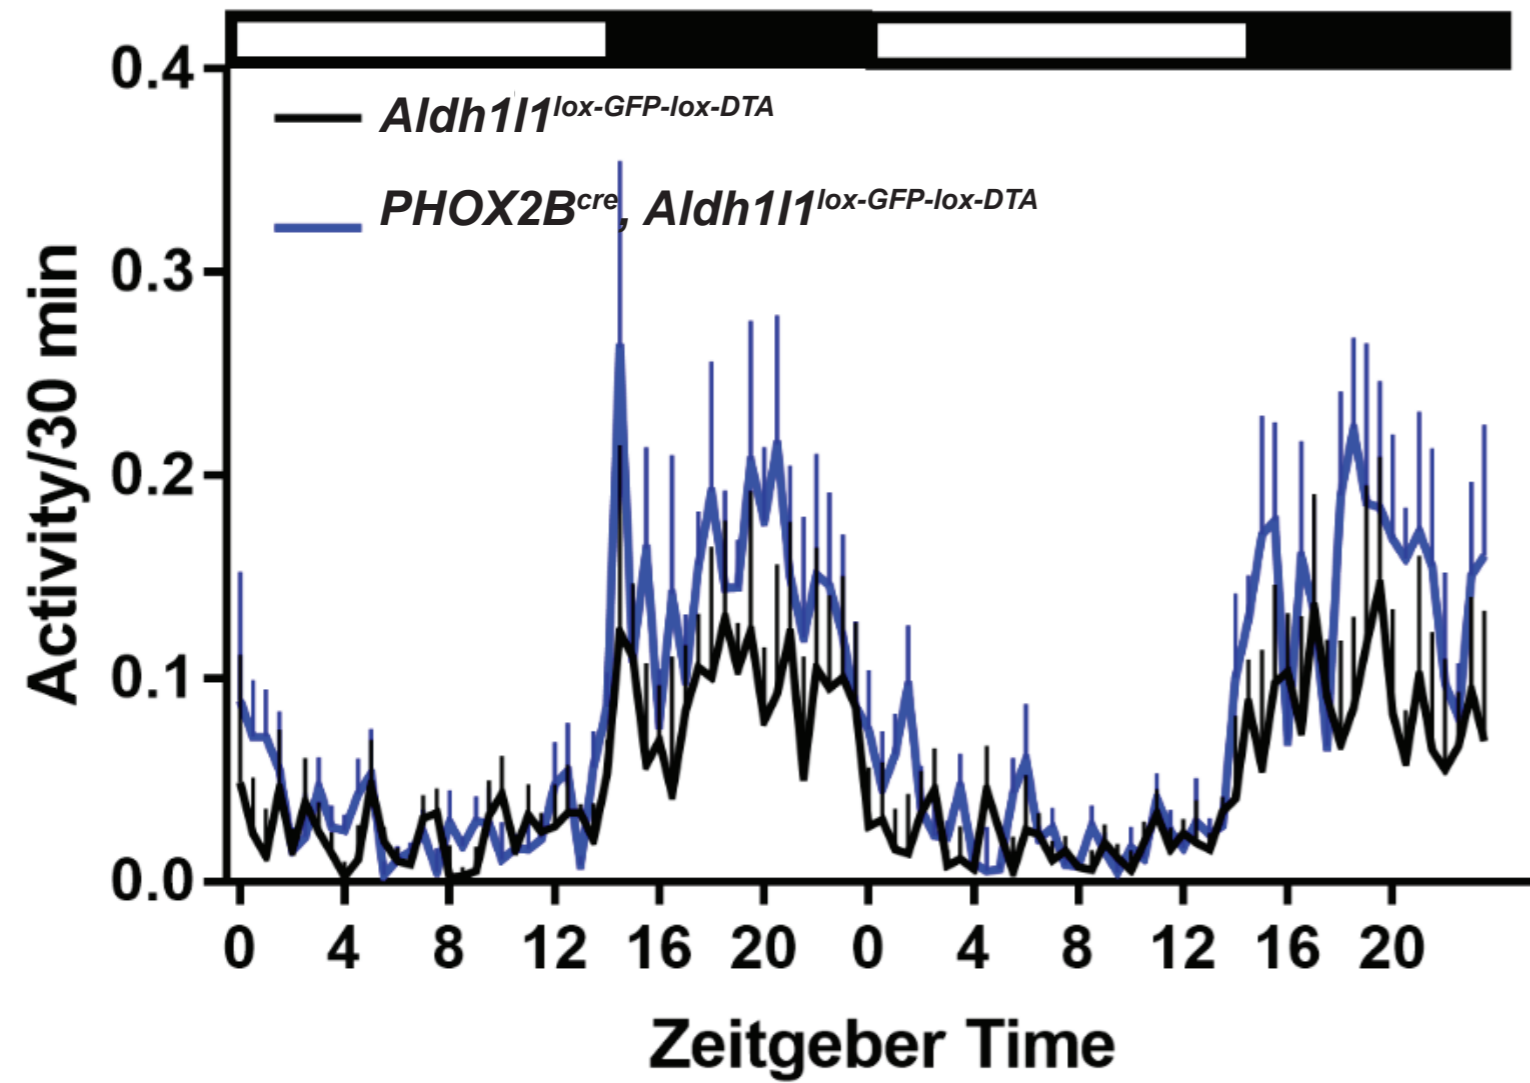

**Females**

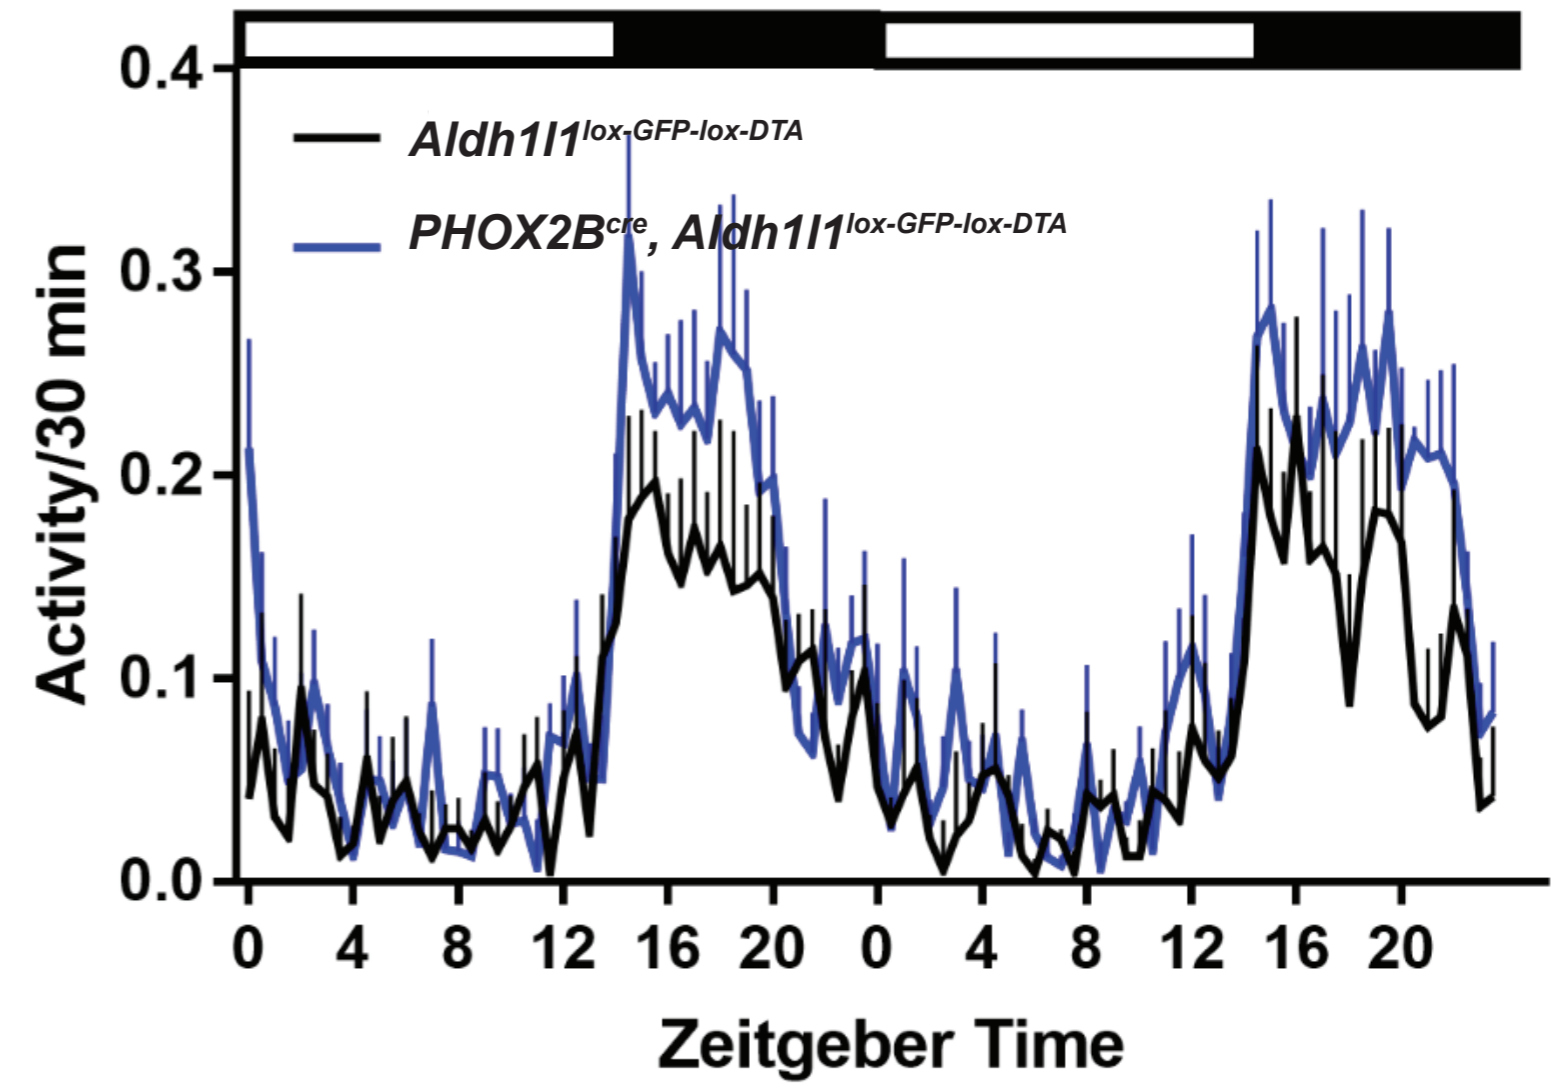

**Males**

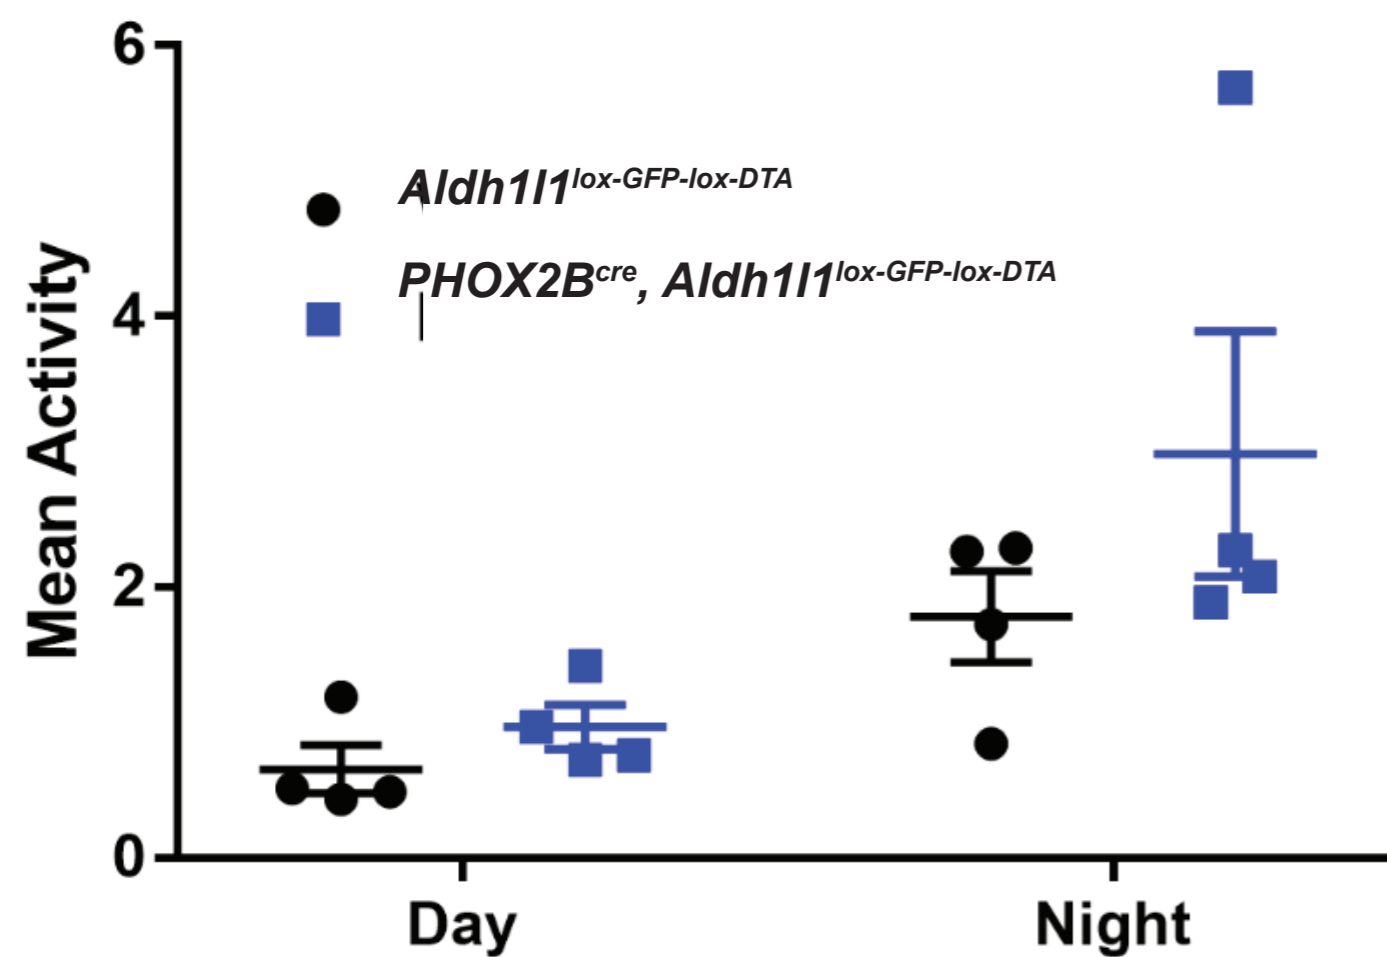

**Females**

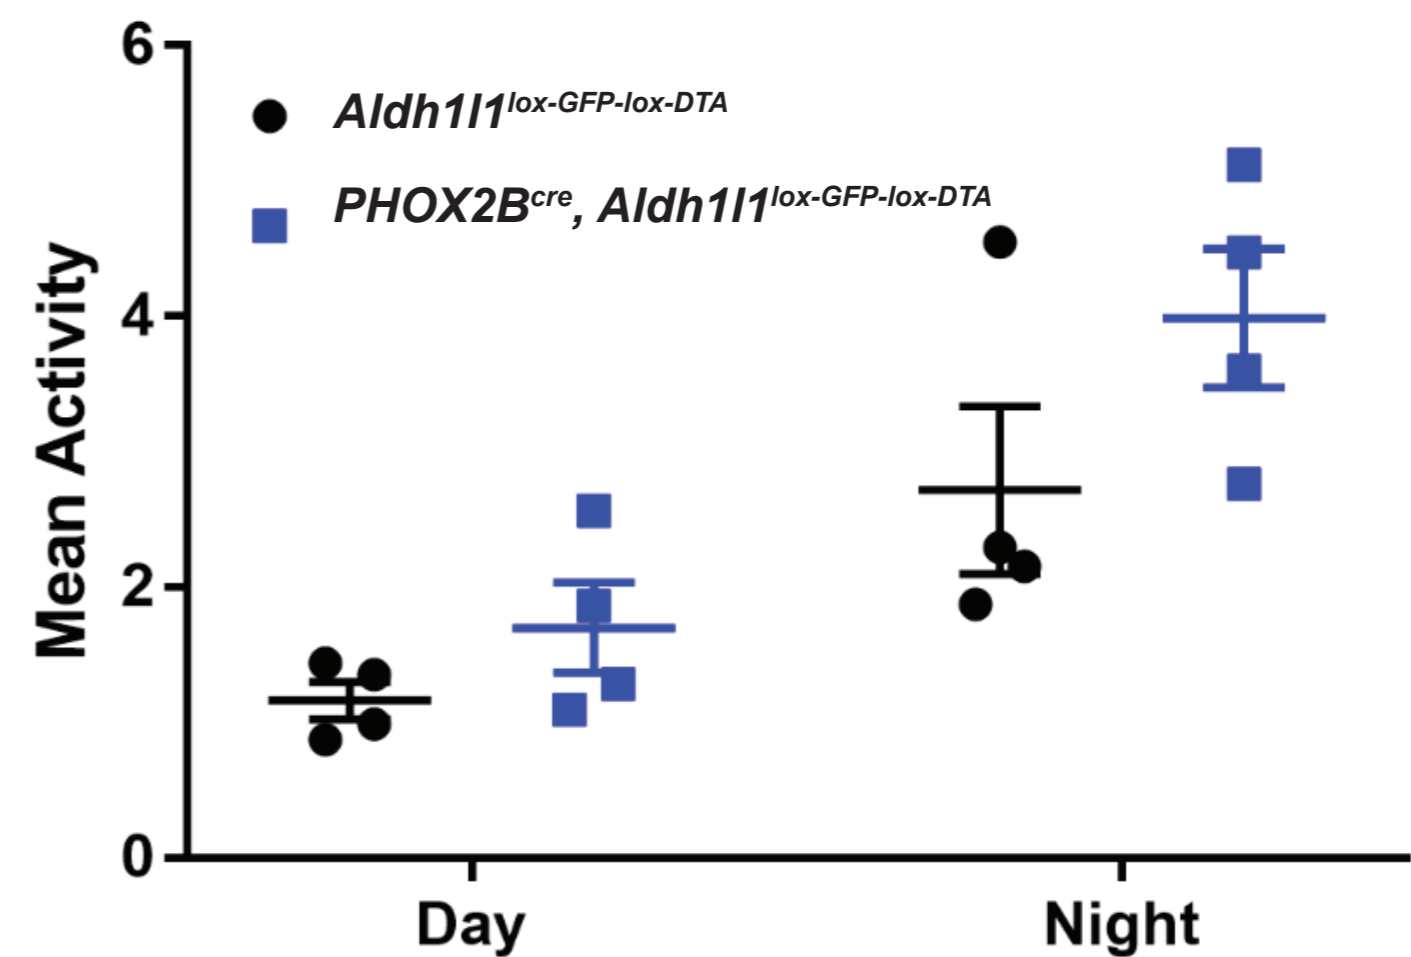

Supplement: TJP-597-2225-s006.pdf [file TJP-597-2225-s006.pdf]
